# Supplementary material for: A method for low-coverage single-gamete sequence analysis demonstrates adherence to Mendel’s first law across a large sample of human sperm
Source: eLife journal article supplement (doi:10.7554/elife.76383), 2022-12-07
Supplement: supp [file elife-76383-supp-v1.zip]

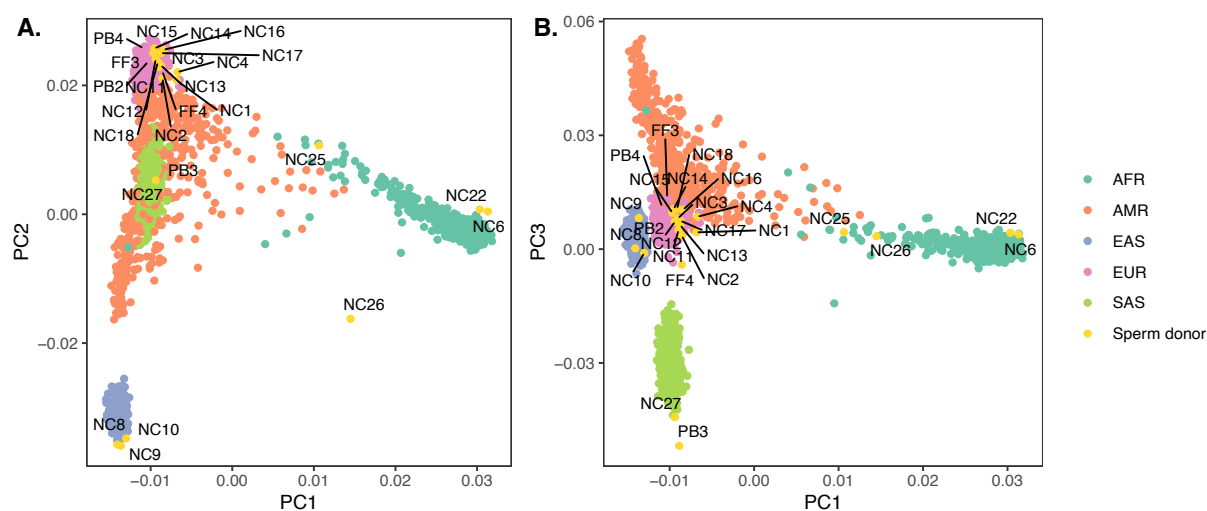

Figure 5-figure supplement 2 Inference of donor ancestry. We use a principal component analysis approach to investigate the genetic similarity of each donor with individuals from the 1000 Genomes Project [69]. Donor individuals are shown in yellow, each labeled with its Donor ID (FF3, NC1, etc.), following the conventions from the papers in which they were initially published [1, 2] and throughout our manuscript. Panel (A) contrasts PC1 with PC2, while panel (B) contrasts PC1 with PC3. The points representing the individuals from the 1000 Genomes Project are color-coded based on their reported superpopulation: Africa (AFR), Americas (AMR), East-Asia (EAS), Europe (EUR), South-Asia (SAS). Results are broadly consistent with self-reported ancestries, including for individuals of recent admixed ancestry [1].
