# Supplementary material for: A method for low-coverage single-gamete sequence analysis demonstrates adherence to Mendel’s first law across a large sample of human sperm
Source: eLife journal article supplement (doi:10.7554/elife.76383), 2022-12-07
Supplement: supp [file elife-76383-supp-v1.zip]

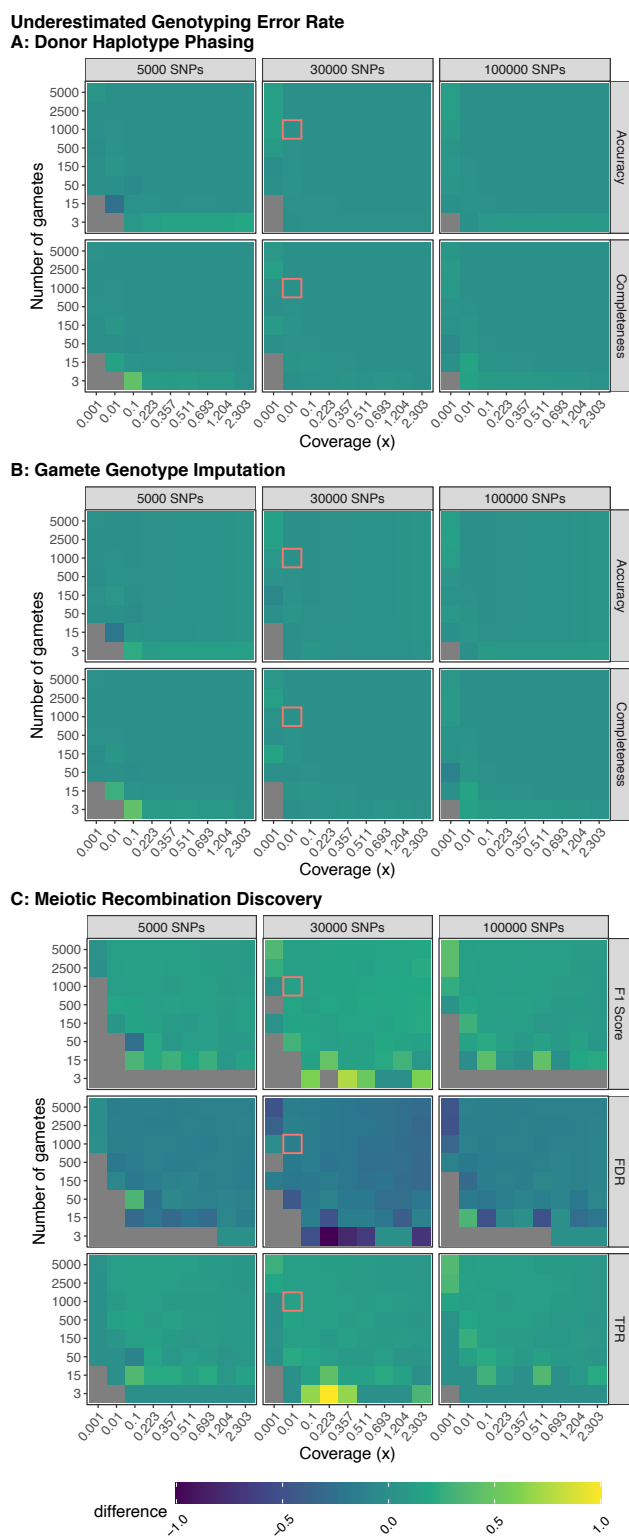

Figure 2-figure supplement 6 Model robustness when genotyping error is underestimated. Plotted values are the difference between the mean performance (across 3 independent trials) when the generative model and rhapsodi use the same parameters (Fig. 2) and the mean performance (across 3 independent trials) when the rhapsodi genotyping error (0.005) is underestimated compared to the rate used by the generative model (0.05). The average recombination rate is 1 per chromosome in both models.
