# Supplementary material for: A method for low-coverage single-gamete sequence analysis demonstrates adherence to Mendel’s first law across a large sample of human sperm
Source: eLife journal article supplement (doi:10.7554/elife.76383), 2022-12-07
Supplement: supp [file elife-76383-supp-v1.zip]

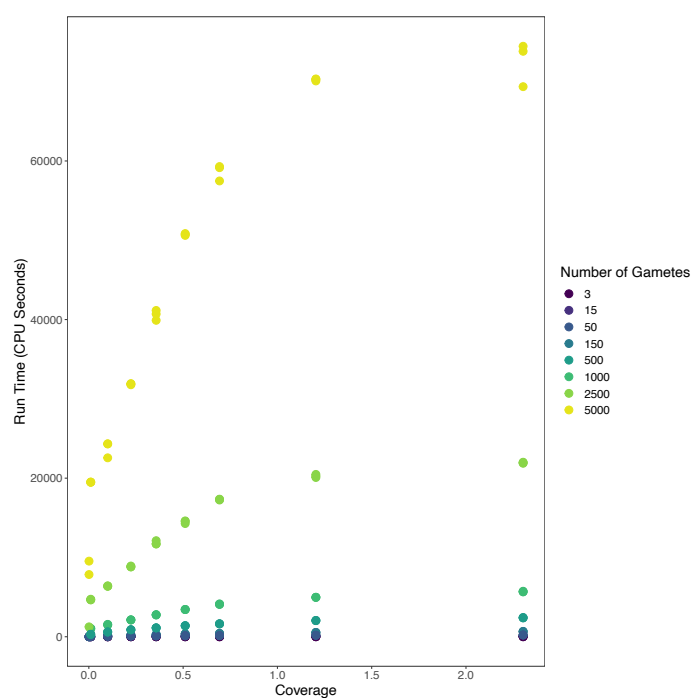

Figure 2-figure supplement 10 Benchmarking rhapsodi runtime across a range of simulated data profiles. We generated sperm-seq datasets with 100,000 SNPs and varied coverages and numbers of gametes. We measured runtime of rhapsodi analysis using the `rhapsodi_autorun` function. Reported time is in CPU seconds, or the combined runtime of all CPUs involved in computation.
