# Supplementary material for: A method for low-coverage single-gamete sequence analysis demonstrates adherence to Mendel’s first law across a large sample of human sperm
Source: eLife journal article supplement (doi:10.7554/elife.76383), 2022-12-07
Supplement: supp [file elife-76383-supp-v1.zip]

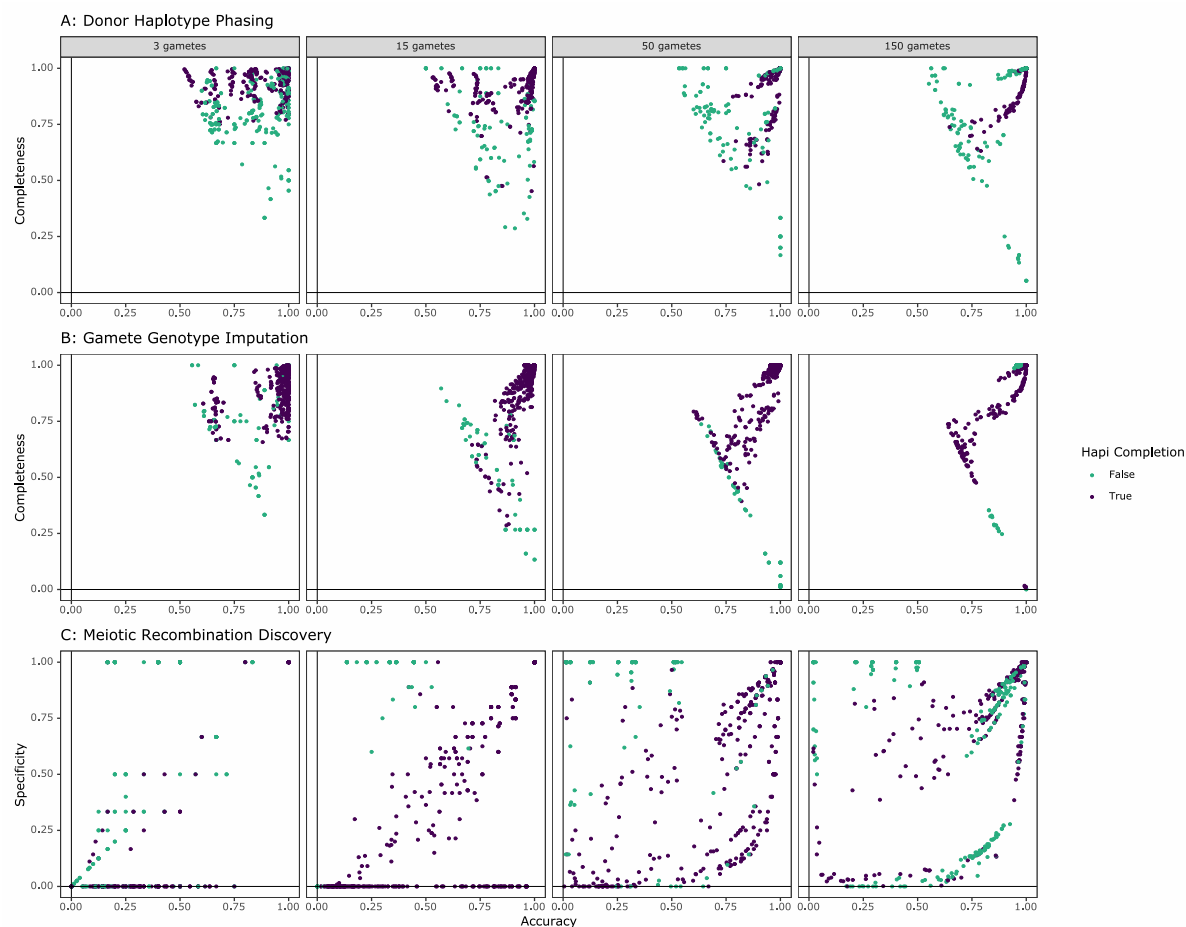

Figure 3-figure supplement 2 Performance of rhapsodi on each simulated dataset, colored based on Hapi's ability to successfully analyze each given data set. False = Not successful; True = Successful. Each column is defined by the number of gametes used in data construction. (A) The relationship between phasing accuracy and completeness. (B) The relationship between mean gamete imputation accuracy and mean completeness. (C) The relationship between meiotic recombination discovery accuracy and specificity.
