# Supplementary material for: A method for low-coverage single-gamete sequence analysis demonstrates adherence to Mendel’s first law across a large sample of human sperm
Source: eLife journal article supplement (doi:10.7554/elife.76383), 2022-12-07
Supplement: supp [file elife-76383-supp-v1.zip]

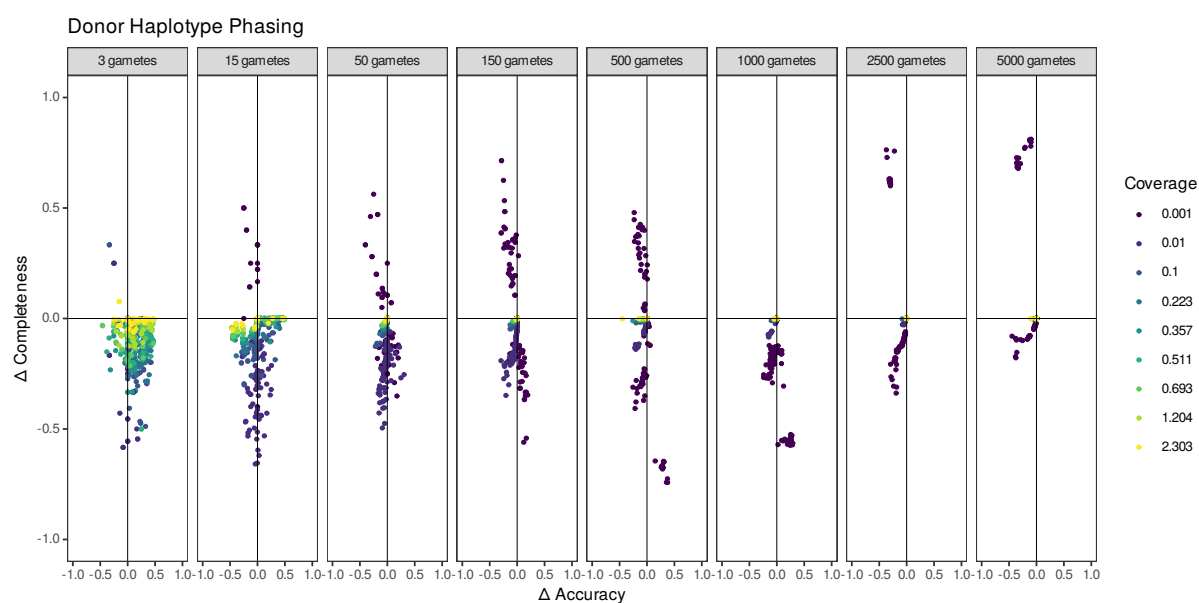

Figure 3-figure supplement 3 Comparison of accuracy and completeness for rhapsodi phasing methods windowWardD2 and linkedSNPHapCUT2. Datasets have varied coverages and gamete numbers, and all have 100,000 SNPs. Each panel shows the difference in performance between phasing methods (windowWardD2 minus linkedSNPHapCUT2) at a given number of gametes. Each point represents a simulated dataset; only datasets successfully phased by both methods are displayed; of 5713 simulations, 1241 simulations that could not be phased using linkedSNPHapCUT2 and 48 simulations that could not be phased using either method are not pictured.
