# Supplementary material for: A method for low-coverage single-gamete sequence analysis demonstrates adherence to Mendel’s first law across a large sample of human sperm
Source: eLife journal article supplement (doi:10.7554/elife.76383), 2022-12-07
Supplement: supp [file elife-76383-supp-v1.zip]

1899 **Figure Supplement Legends**  
1900 **Figure 2 - Figure Supplements**

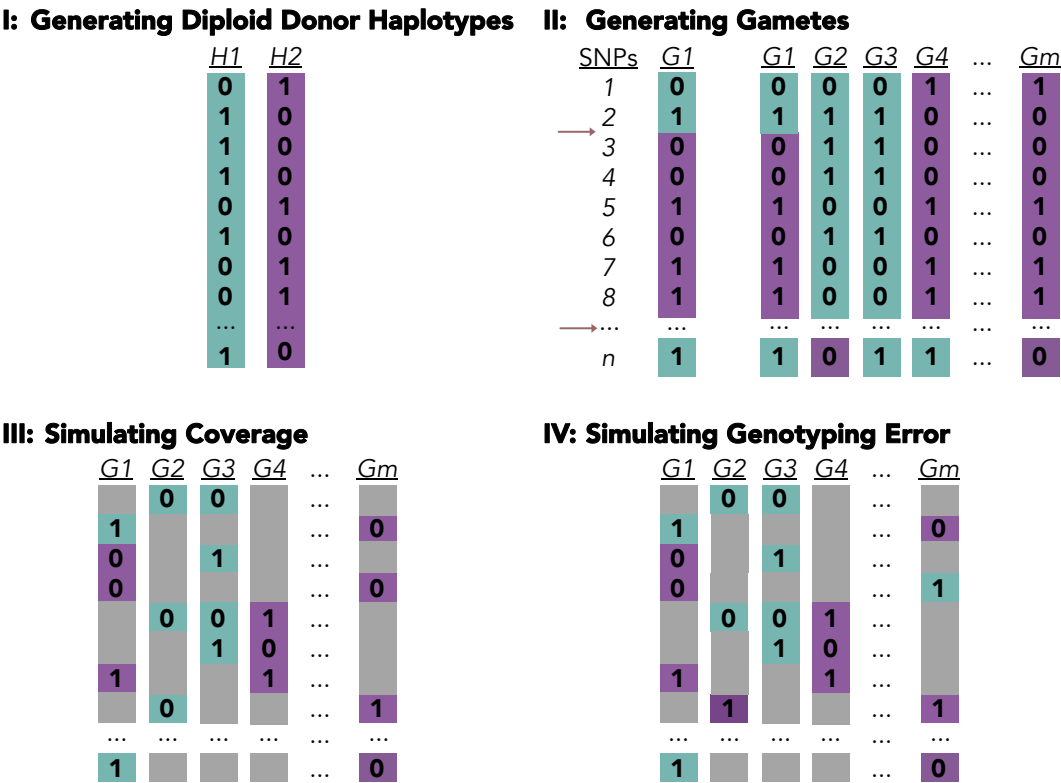

Figure 2-figure supplement 1 Generative Model. (I) The first step of the generative model builds the phased haplotypes of the diploid donor, with n hetSNPs. (II) In the second step, gamete genotypes are derived from the diploid donor haplotypes by simulating meiotic recombination events, repeating the process for all gametes, {1, ..., m}. (III) In the third step, low-coverage sequencing data is generated by removing genotypes from a copy of the gamete genotype matrix. (IV) In the final step, genotyping error is simulated by randomly replacing a small fraction of genotypes with the opposite allele.
