# Supplementary material for: A method for low-coverage single-gamete sequence analysis demonstrates adherence to Mendel’s first law across a large sample of human sperm
Source: eLife journal article supplement (doi:10.7554/elife.76383), 2022-12-07
Supplement: supp [file elife-76383-supp-v1.zip]

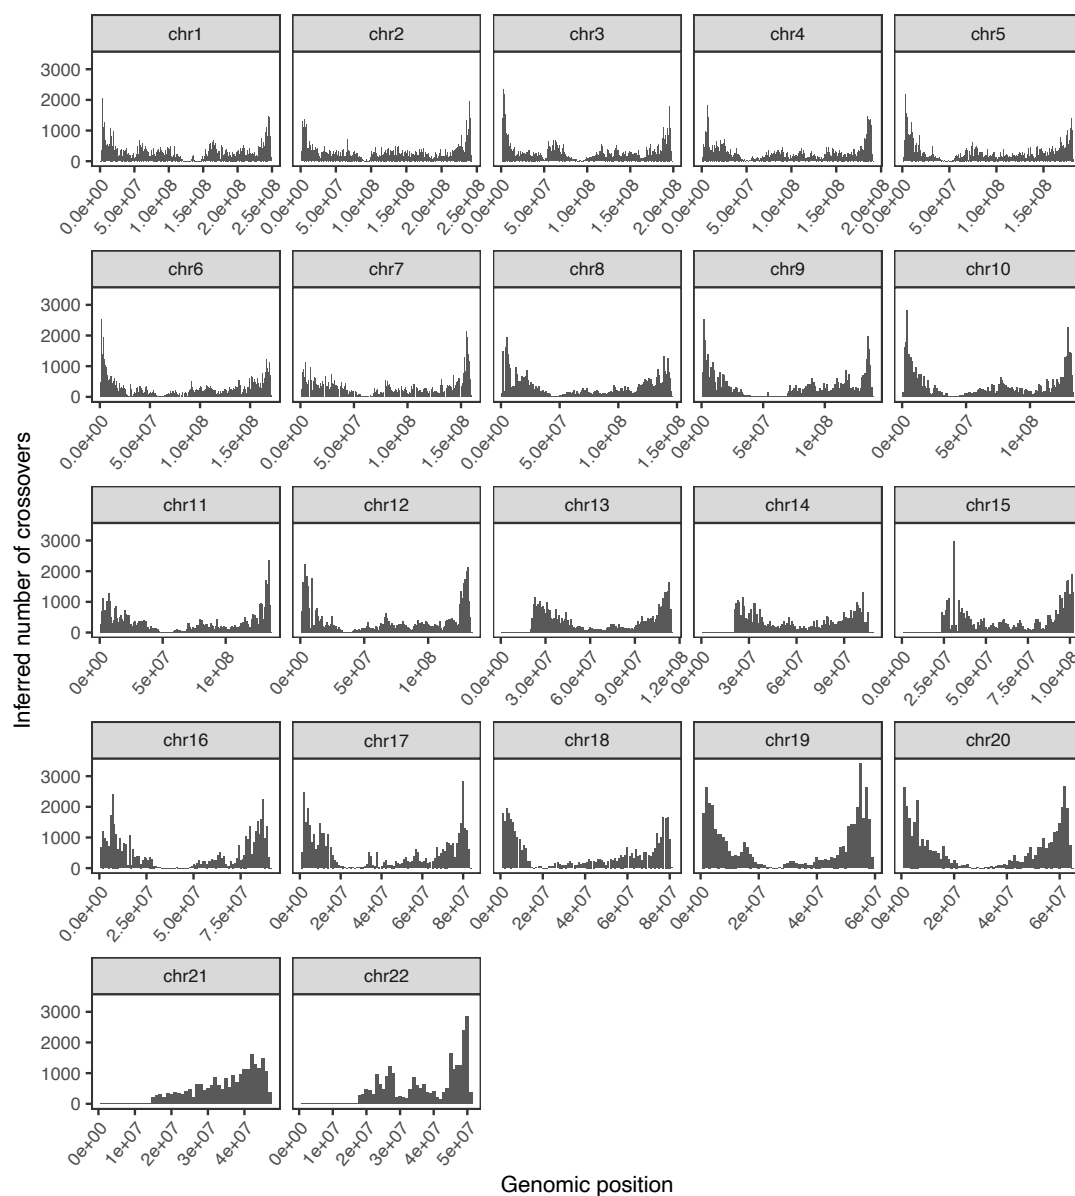

Figure 5-figure supplement 4 Recombination map of inferred crossovers in the Sperm-seq data. This map displays counts of the inferred number of crossovers within each 1 Mbp bin for each chromosome, pooling inference across the 25 donors. We used the midpoint of each crossover's predicted breakpoints to localize the event to a specific bin.
