# Supplementary material for: A method for low-coverage single-gamete sequence analysis demonstrates adherence to Mendel’s first law across a large sample of human sperm
Source: eLife journal article supplement (doi:10.7554/elife.76383), 2022-12-07
Supplement: supp [file elife-76383-supp-v1.zip]

### Overestimated Average Recombination Rate

#### A: Donor Haplotype Phasing

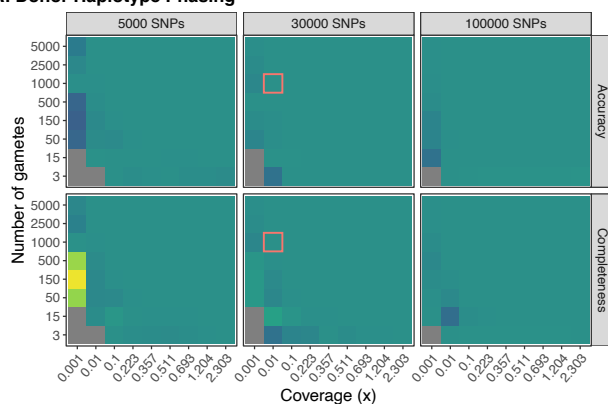

#### B: Gamete Genotype Imputation

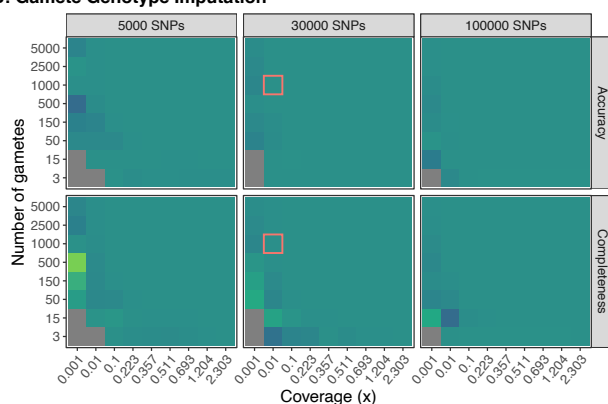

#### C: Meiotic Recombination Discovery

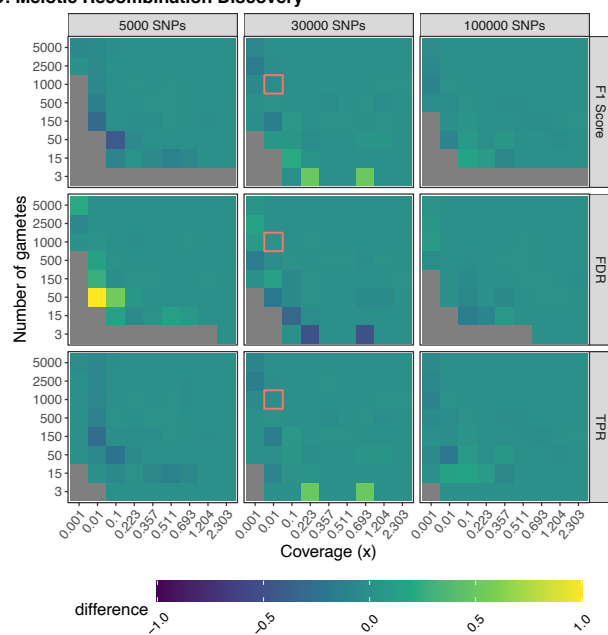

Figure 2-figure supplement 9 Model robustness when recombination rate is overestimated. Plotted values are the difference between the mean performance (across 3 independent trials) when the generative model and rhapsodi use the same parameters (Fig. 2) and the mean performance (across 3 independent trials) when the rhapsodi recombination rate (1) is overestimated compared to the rate used by the generative model (0.6). The genotyping error rate is 0.005 in both models.
