# Supplementary material for: A method for low-coverage single-gamete sequence analysis demonstrates adherence to Mendel’s first law across a large sample of human sperm
Source: eLife journal article supplement (doi:10.7554/elife.76383), 2022-12-07
Supplement: supp [file elife-76383-supp-v1.zip]

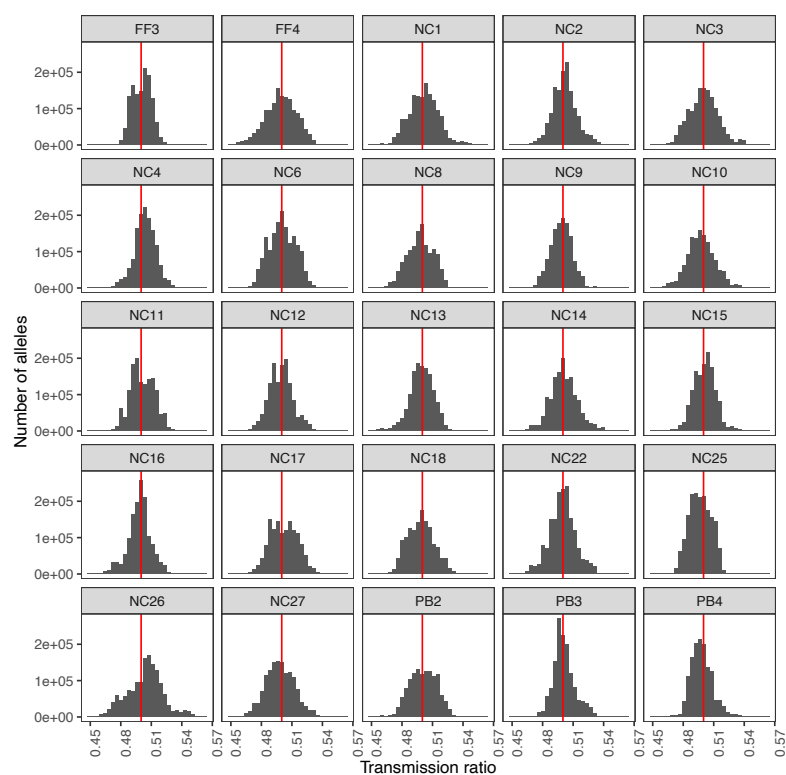

Figure 5-figure supplement 6 Visualization of transmission rate of each allele within the pool of sperm, by donor. Points are distributed around a transmission rate of 0.5 (shown as red line).
