# Supplementary material for: A method for low-coverage single-gamete sequence analysis demonstrates adherence to Mendel’s first law across a large sample of human sperm
Source: eLife journal article supplement (doi:10.7554/elife.76383), 2022-12-07
Supplement: supp [file elife-76383-supp-v1.zip]

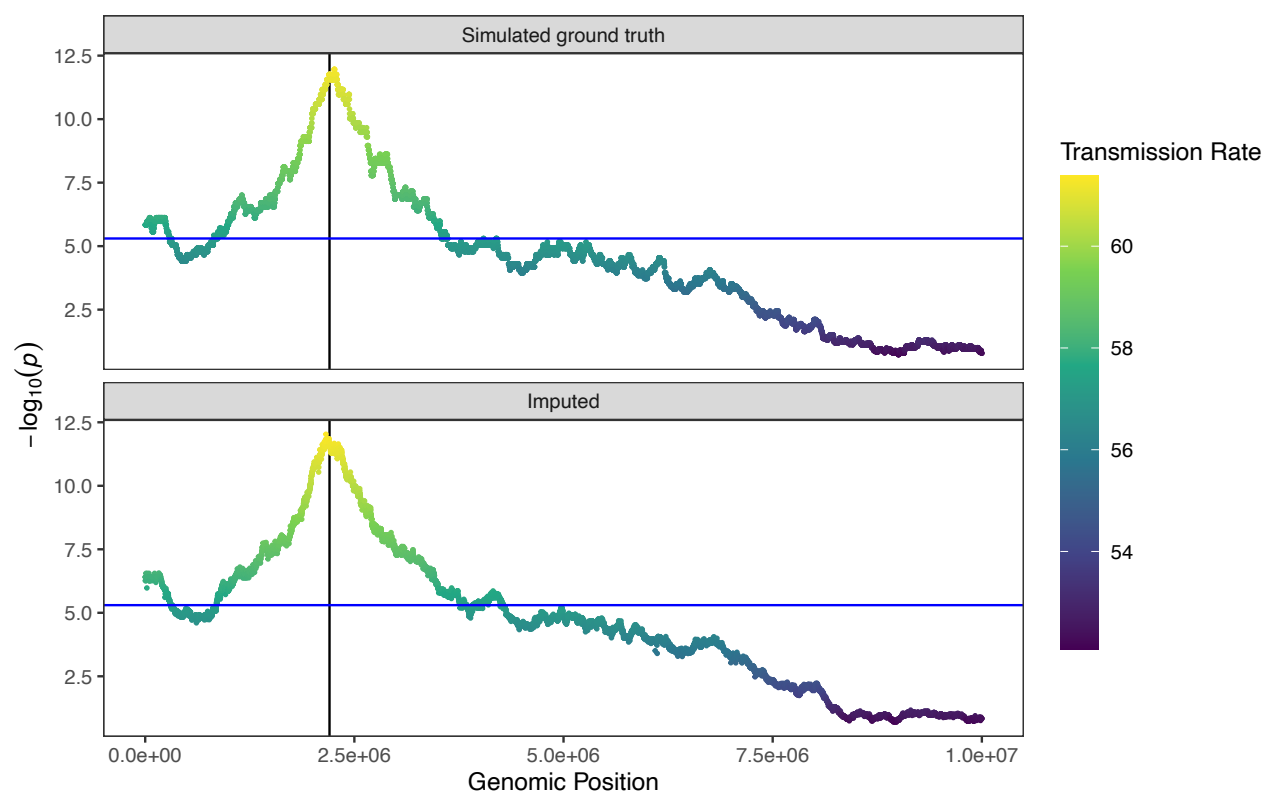

Figure 4-figure supplement 2 Simulated signature of transmission distortion. We simulated 1000 gametes with 10,000 SNPs. We generated TD by choosing an allele at random and removing 30% of gametes which carried that allele. We simulated coverage of  $0.01\times$  and genotyping error rate of 0.005 and then imputed gamete genotypes using rhapsodi. Top and bottom panels show results of testing for transmission distortion on simulated ground truth and imputed data, respectively.
