# Supplementary material for: A method for low-coverage single-gamete sequence analysis demonstrates adherence to Mendel’s first law across a large sample of human sperm
Source: eLife journal article supplement (doi:10.7554/elife.76383), 2022-12-07
Supplement: supp [file elife-76383-supp-v1.zip]

Figure 3 - Figure Supplements

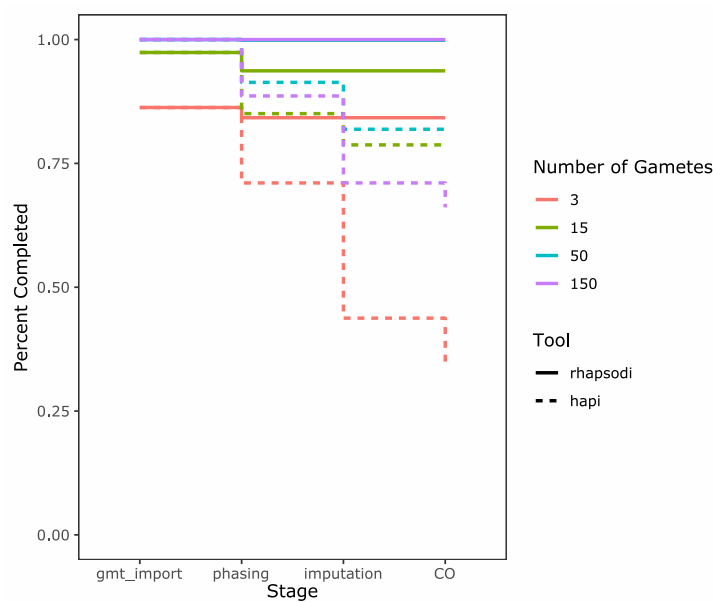

Figure 3-figure supplement 1 Comparison of the percentage of simulated datasets successfully analyzed by rhapsodi and Hapi across (1) data import (gmt\_import) (2) donor haplotype phasing (phasing) (3) gamete genotype imputation (imputation), & (4) meiotic recombination discovery (CO) stages. The datasets were stratified into groups according to the number of gametes used in construction, signified by color. The run completion trend for each tool is signified by line-type.
